# Supplementary material for: The rapid synthesis of intrinsic green-fluorescent poly(pyrogallol)-derived carbon dots for amoxicillin drug sensing in clinical samples
Source: Royal Society of Chemistry journal article supplement (doi:10.1039/d2nj03915j), 2022-01-01
Supplement: d2nj03915j1.pdf [file d2nj03915j1.pdf]

1 **Supporting Information**

2

3 **A Rapid Synthesis of Intrinsic Green Fluorescent Poly(pyrogallol) Derived**  
4 **Carbon Dots for Amoxicillin Drug Sensor in Clinical Samples**

5 Ashkar M.A<sup>a</sup>, M. Chandhru<sup>a</sup>, M. Sundar<sup>b</sup>, S. Kutti Rani<sup>a\*</sup>, N. Vasimalai<sup>a\*</sup>

6 a. Department of Chemistry, B.S. Abdur Rahman Crescent Institute of Science and  
7 Technology, Vandalur, Chennai-600 048, India.

8 b. Research, Science Academy of India, Madambakkam, Chennai, Tamil Nadu, 603 202  
9 India

10

11 Corresponding authors:

12 Email: [skrani@crescent.education](mailto:skrani@crescent.education) ( S. Kutti Rani)

13 [vasimalai2020@gmail.com](mailto:vasimalai2020@gmail.com) (N. vasimalai)

14

15

16

17

18

19

20

21

22

23

## 26 CONTENTS:

| <b>Figure No.</b> | <b>Figure Name</b>                                                                                                                                                                                                                                                                                                                                                                      | <b>Page No.</b> |
|-------------------|-----------------------------------------------------------------------------------------------------------------------------------------------------------------------------------------------------------------------------------------------------------------------------------------------------------------------------------------------------------------------------------------|-----------------|
| <b>Fig. S1</b>    | UV Vis Spectra of (a) Pyrogallol, (b) Pyrogallol after Base Treatment, (c) PC dots                                                                                                                                                                                                                                                                                                      | <b>S3</b>       |
| <b>Fig. S2</b>    | The effect of NaOH concentration on the synthesis of PC dots                                                                                                                                                                                                                                                                                                                            | <b>S4</b>       |
| <b>Fig. S3</b>    | The effect of Volume of H <sub>2</sub> O <sub>2</sub> on the synthesis of PC dots                                                                                                                                                                                                                                                                                                       | <b>S4</b>       |
| <b>Fig. S4</b>    | The effect of Temperature on the synthesis of PC dots                                                                                                                                                                                                                                                                                                                                   | <b>S5</b>       |
| <b>Fig. S5</b>    | The effect Time on the synthesis of PC dots                                                                                                                                                                                                                                                                                                                                             | <b>S5</b>       |
| <b>Fig. S6a</b>   | The stability study of PC dots: Intensity Vs Time at different time interval                                                                                                                                                                                                                                                                                                            | <b>S6</b>       |
| <b>Fig. S6b</b>   | The ionic strength study of PC dots: Concentration of NaCl Vs Intensity                                                                                                                                                                                                                                                                                                                 | <b>S6</b>       |
| <b>Fig. S6c</b>   | The Effect of pH: Fluorescence intensity of PC dots V pH                                                                                                                                                                                                                                                                                                                                | <b>S7</b>       |
| <b>Fig. S6d</b>   | The fluorescence emission study of PC dots at various irradiation time Inset: Photograph of PC dots (i) before and (ii) after 180 min uv irradiation.                                                                                                                                                                                                                                   | <b>S7</b>       |
| <b>Fig. S7</b>    | XRD pattern of PC dots                                                                                                                                                                                                                                                                                                                                                                  | <b>S8</b>       |
| <b>Fig. S8</b>    | The FT-IR Spectra of (a) Pyrogallol (b) Polymerized Pyrogallol after treatment with base (c) PC dots                                                                                                                                                                                                                                                                                    | <b>S8</b>       |
| <b>Fig. S9</b>    | The Quenching constant plot of AMX                                                                                                                                                                                                                                                                                                                                                      | <b>S9</b>       |
| <b>Fig. S10</b>   | Competitive assay in the presence 2.49 X 10 <sup>-6</sup> M AMX Vs common interferences such as chloramphenicol (CHP), paracetamol (PML), creatinine (CTN), pantoprazole sodium (PZS ), tetracycline (TC), cephalixin hydrate (CPH), cystine (CYS), topiramate (TPT), ascorbic acid (AA), omeprazole (OMZ), glutathione (GTH) interferences. with 5 X 10 <sup>-1</sup> M concentration. | <b>S9</b>       |

28  
29  
30  
31  
32  
33  
34  
35  
36  
37  
38  
39  
40  
41  
42  
43  
44  
45  
46  
47  
48  
49  
50  
51  
52  
53  
54  
55  
56  
57  
58

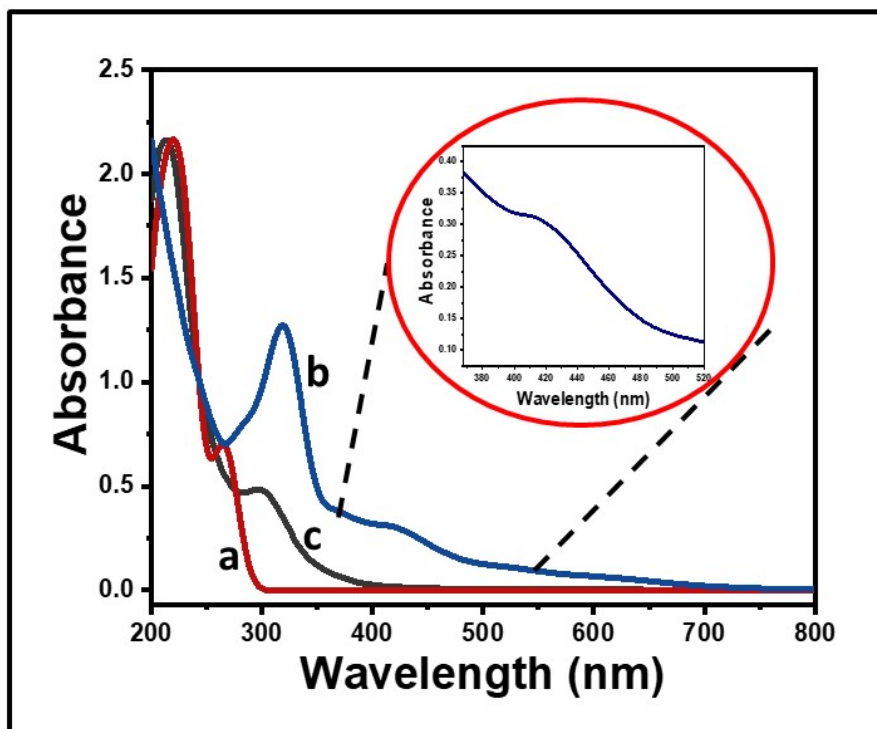

**Fig. S1** UV Vis Spectra of Pyrogallol before (a) after (b) base treatment, (c) PC dots.

59  
60  
61  
62  
63  
64  
65  
66  
67  
68  
69  
70  
71  
72  
73  
74  
75  
76  
77  
78  
79  
80  
81  
82  
83  
84  
85  
86  
87  
88  
89

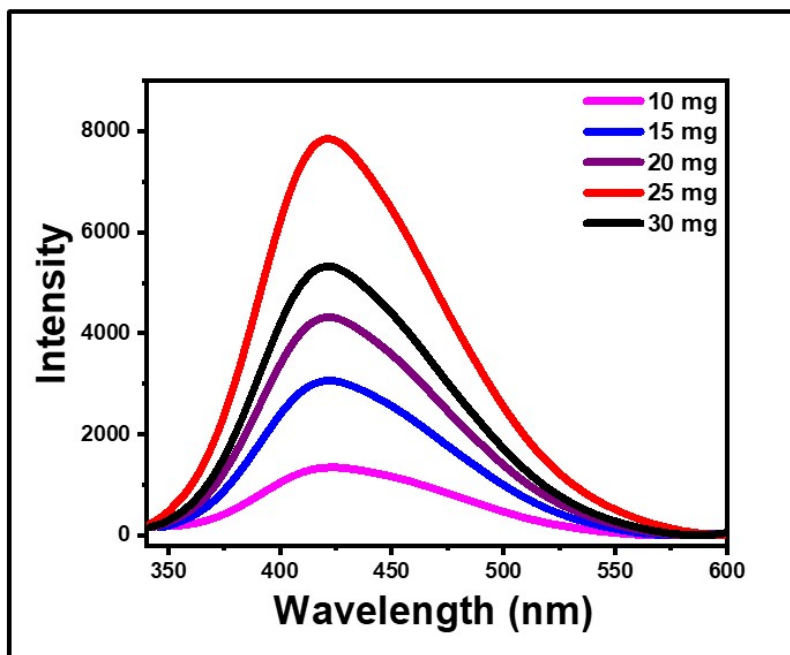

Fig. S2 The effect of NaOH concentration on the synthesis of PC dots.

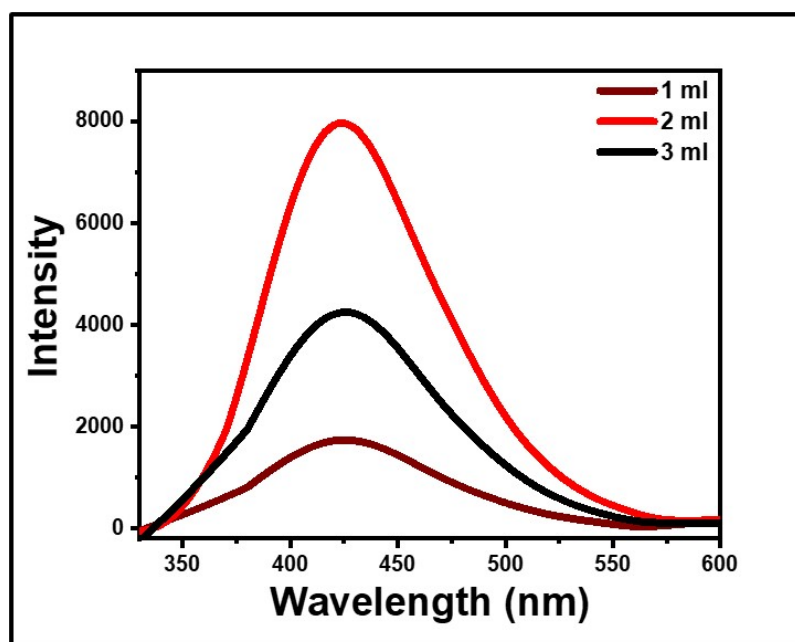

Fig. S3 The effect of Volume of H<sub>2</sub>O<sub>2</sub> concentration the synthesis of PC dots.

90  
91  
92  
93  
94  
95  
96  
97  
98  
99  
100  
101  
102  
103  
104  
105  
106  
107  
108  
109  
110  
111  
112  
113  
114  
115  
116  
117  
118  
119  
120

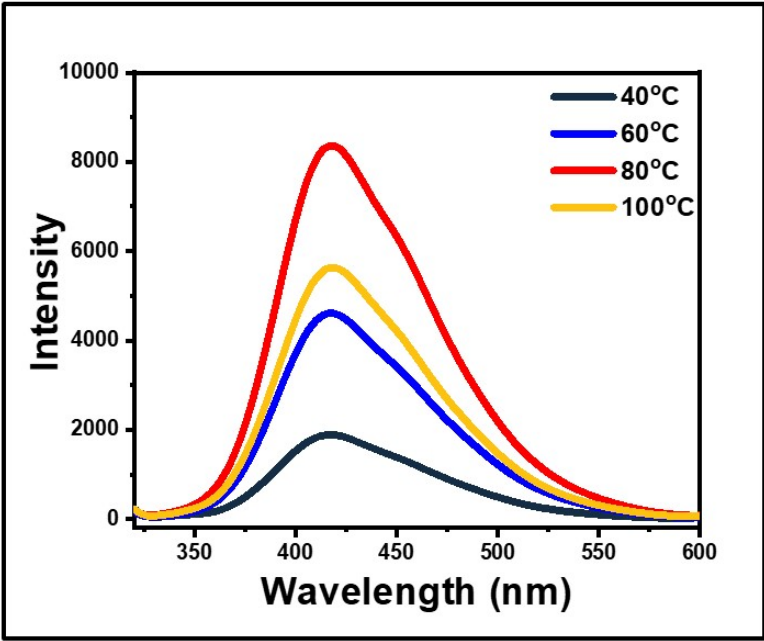

Fig. S4 The effect of temperature on the synthesis of PC dots.

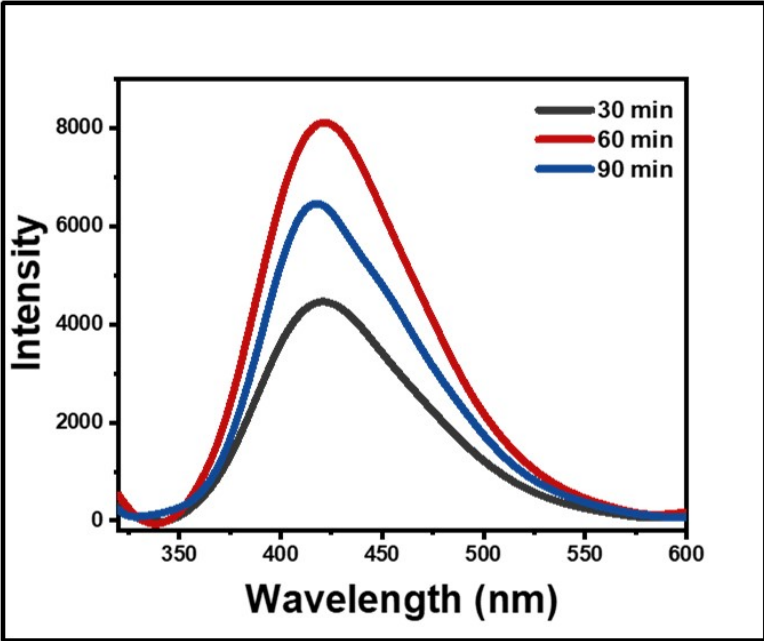

Fig. S5 The effect time on the synthesis of PC dots.

121  
122  
123  
124  
125  
126  
127  
128  
129  
130  
131  
132  
133  
134  
135  
136  
137  
138  
139  
140  
141  
142  
143  
144  
145  
146  
147  
148  
149  
150  
151

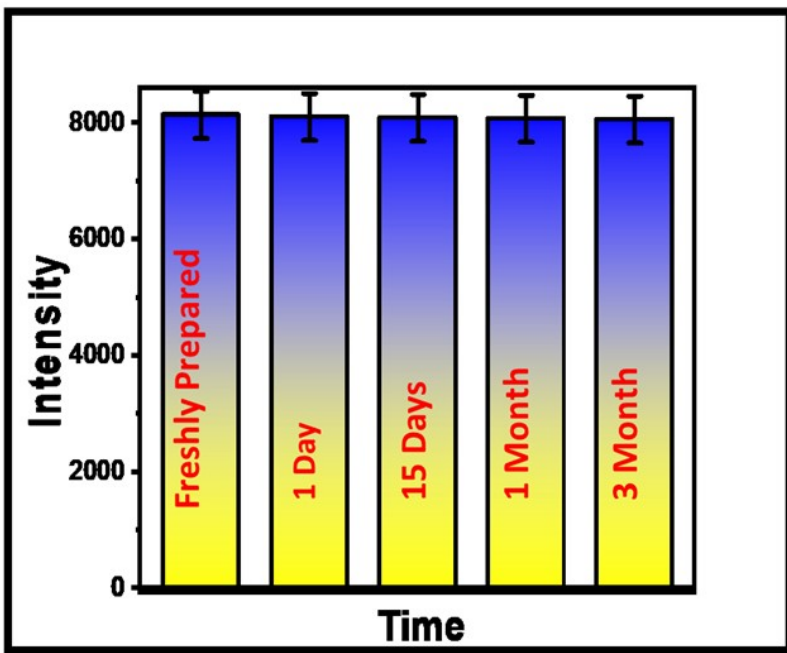

Fig. S6a The stability of PC dots: Intensity Vs Time.

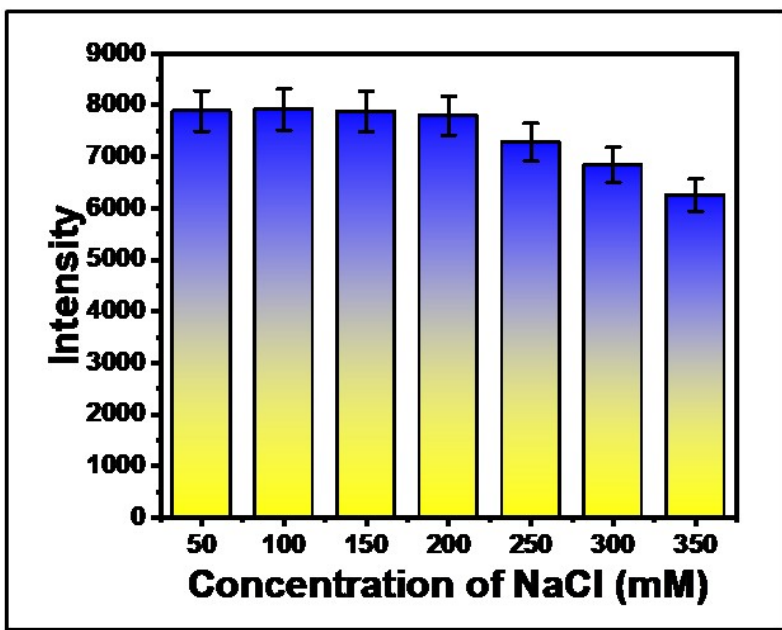

Fig. S6b The ionic strength study of PC dots: concentration of NaCl Vs Intensity.

152  
153  
154  
155  
156  
157  
158  
159  
160  
161  
162  
163

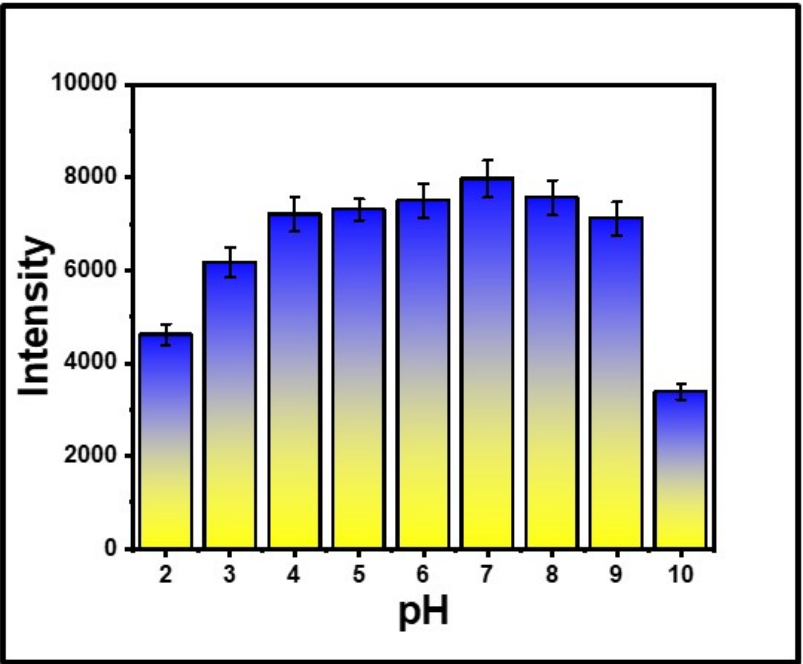

164 **Fig. S6c** The Effect of pH: Fluorescence intensity of PC dots Vs pH.

165  
166  
167  
168  
169  
170  
171  
172  
173  
174  
175  
176

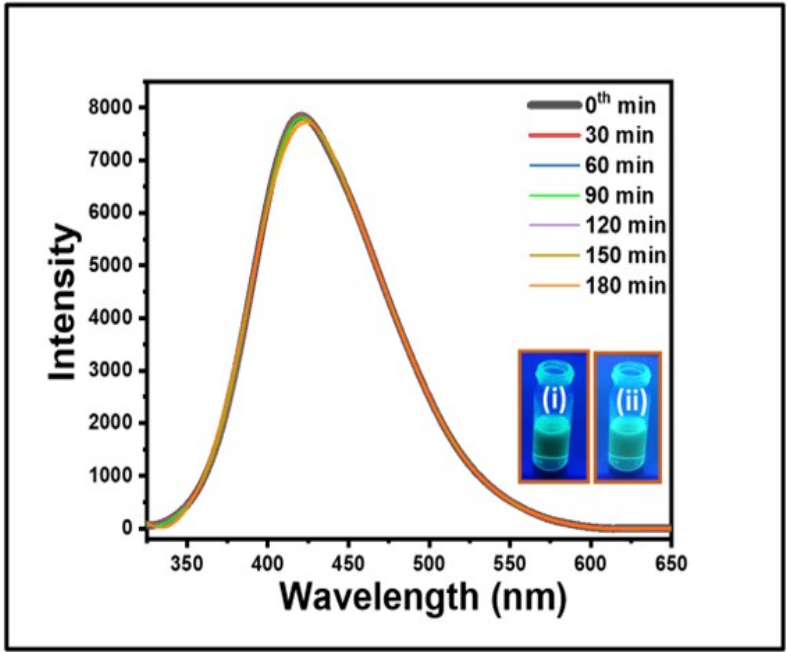

177 **Fig. S6d** The fluorescence emission study of PC dots at various irradiation time  
178 *Inset:* Photograph of PC dots (i) before and (ii) after 180 min uv irradiation.

179  
180  
181  
182  
183  
184  
185  
186  
187  
188  
189  
190

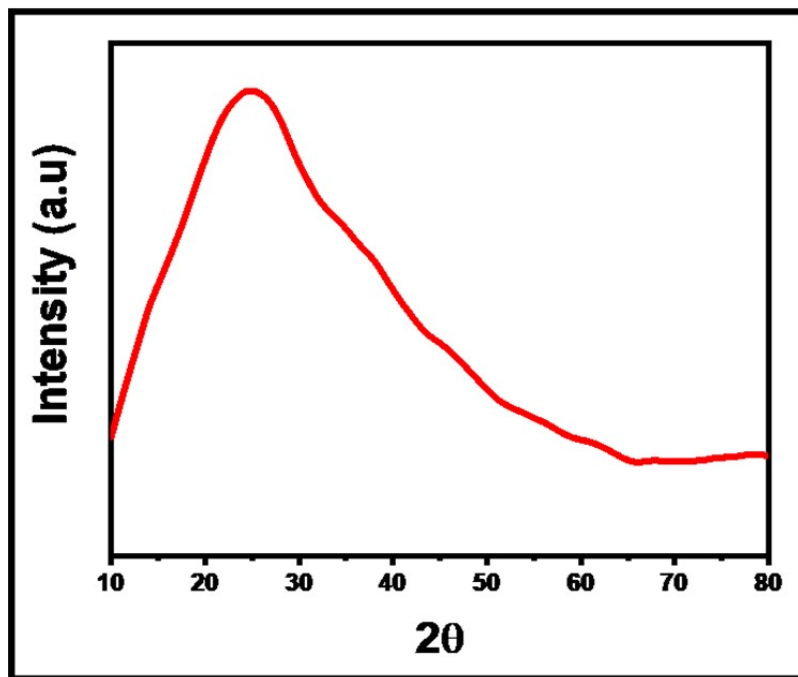

191 Fig. S7 XRD pattern of PC dots.

192  
193  
194  
195  
196  
197  
198  
199  
200  
201  
202  
203  
204

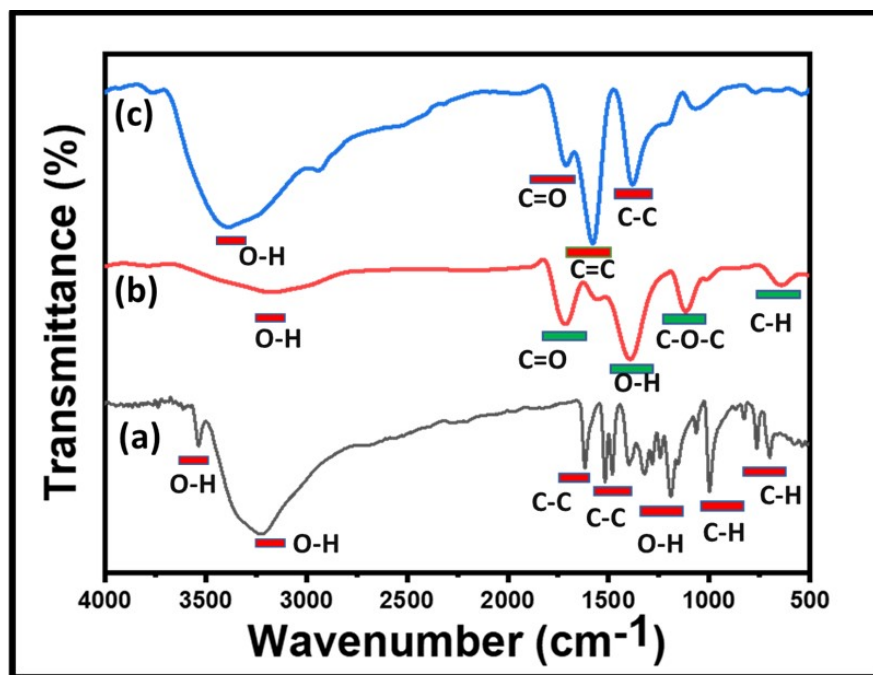

205 Fig. S8 The FT-IR Spectra of (a) Pyrogallol (b) Polymerized Pyrogallol after  
206 treatment with base (c) PC dots.



207  
208  
209  
210  
211  
212  
213  
214  
215  
216  
217  
218  
219

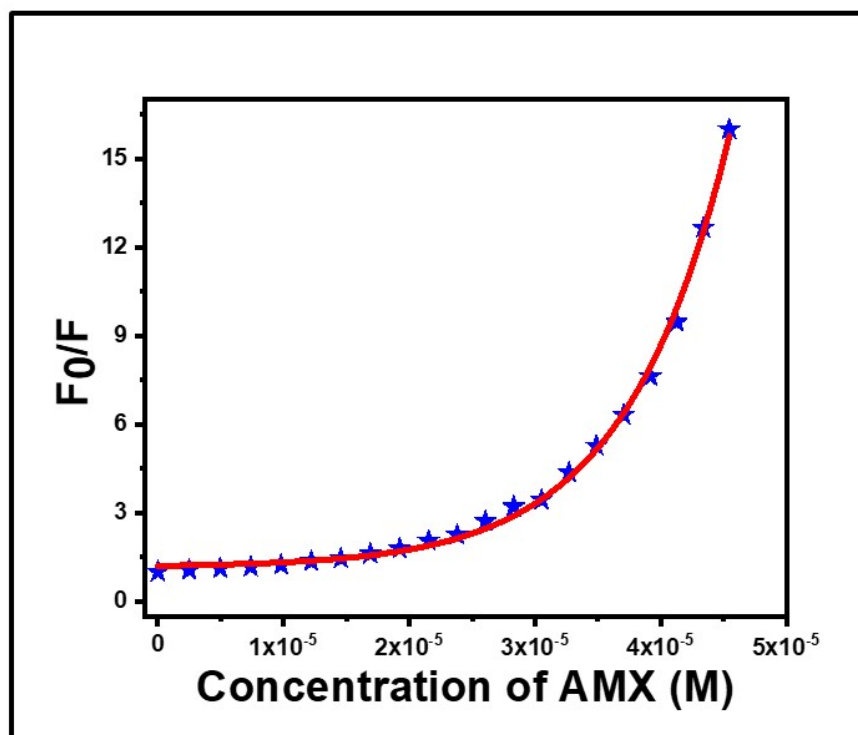

220

**Fig. S9** The Plot of Quenching Constant of AMX.

221  
222  
223  
224  
225  
226  
227  
228  
229  
230  
231  
232

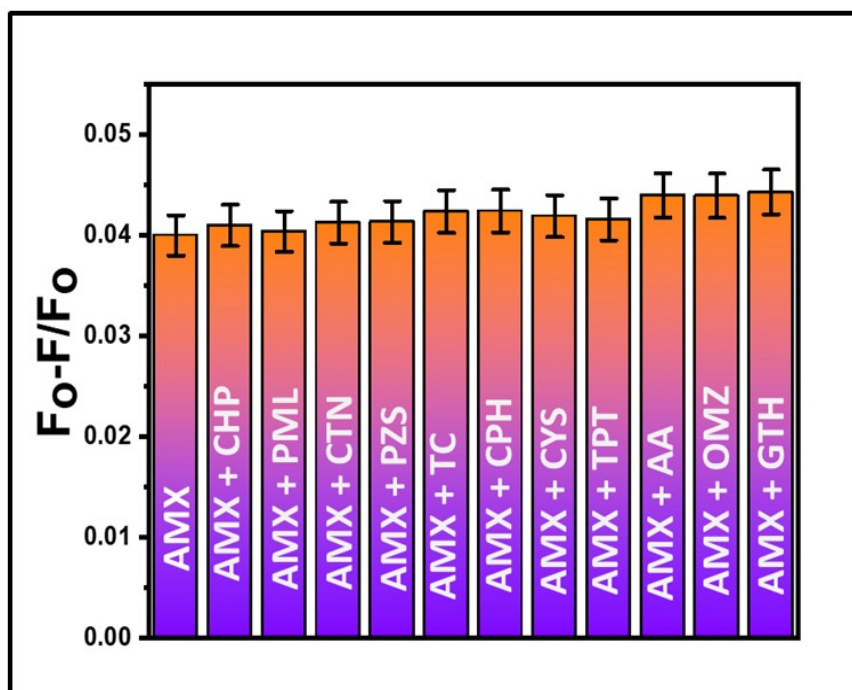

233 **Fig. S10** Competitive assay in the presence  $2.49 \times 10^{-6}$  M AMX Vs common interferences  
234 such as chloramphenicol (CHP), paracetamol (PML), creatinine (CTN), pantoprazole sodium  
235 (PZS ), tetracycline (TC), cephalexin hydrate (CPH), cystine (CYS), topiramate (TPT),  
236 ascorbic acid (AA), omeprazole (OMZ), glutathione (GTH) interferences. with  $5 \times 10^{-1}$  M  
237 concentration.
